# Supplementary material
Source: PubMed Central journal article supplement (PMC8491079)
Supplement: kiab276_supplementary_data.pdf [file kiab276_supplementary_data.pdf]

Supplementary material.  
Supplemental Figure S1.

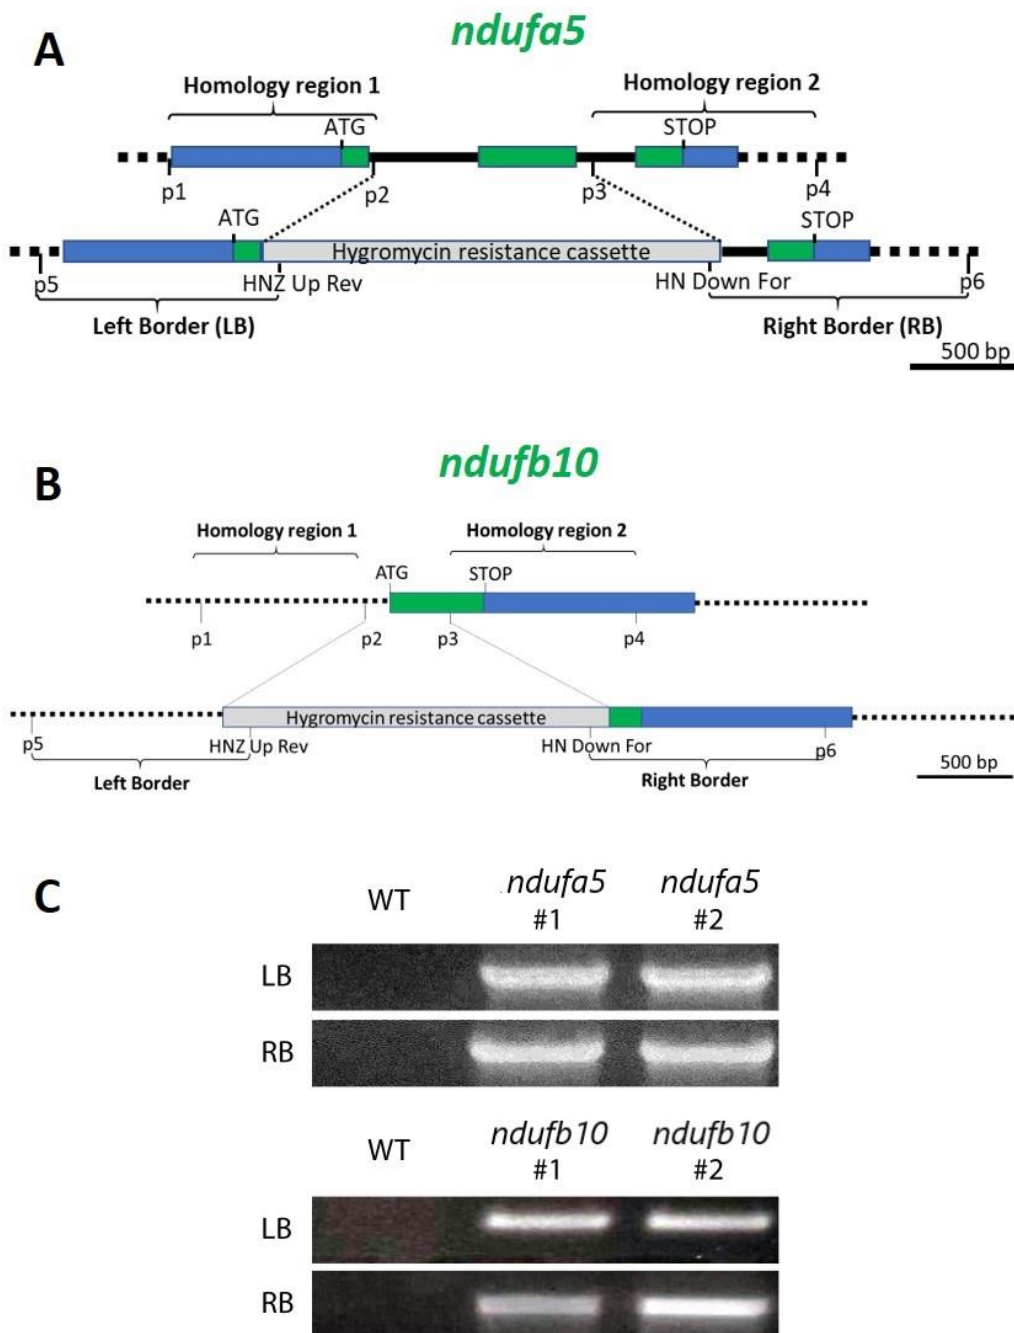

**Supplemental Figure S1. Generation of *P. patens* mutant lines lacking respiratory complex I** A-B) KO scheme for *Ndufa5* and *Ndufb10* respectively, showing the CDS, the regions of homology chosen to drive homologous recombination and insertion of the resistance cassette. In A and B are indicated the position of the primers employed for recombination cassette construction (p1, p2, p3 and p4) and primers employed in mutant screening (p5, p6, HN Z Up Rev and HN Down for). C) Example of PCR for verification of the homologous recombination event. PCR products (called Left and Right Border, LB and RB; all PCR products have an expected size of ca 1200 bp. LB was performed with primer p5 and HN Z Up rev while RB was performed with HN Down for and p6) are generated only if the resistance cassette is inserted in the expected genomic region.

Supplemental Figure S2.

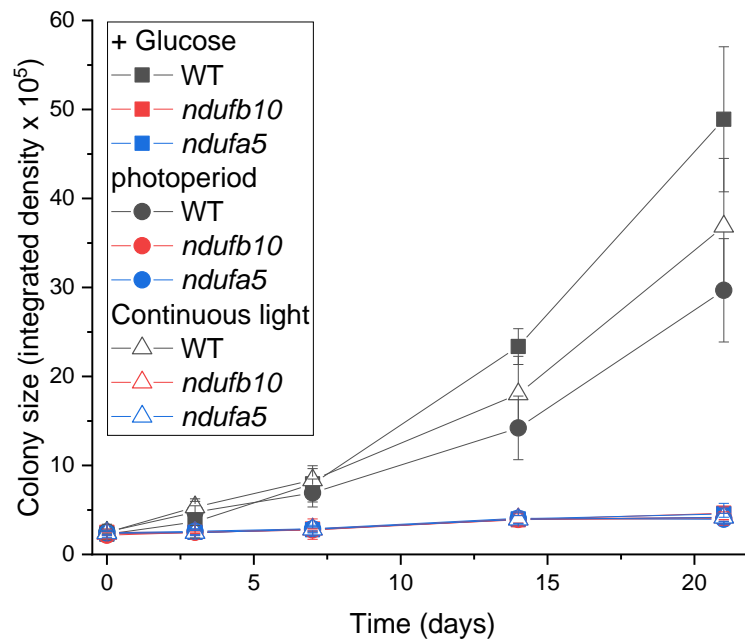

**Supplemental Figure S2. Growth kinetics of *P. patens* plants under different conditions.** Plants were grown under different light regimes and different medium composition as shown in Figure 2 and their size was evaluated after 0, 3, 7, 14 and 21 days of growth. All plants were exposed to 50  $\mu\text{mol photons m}^{-2} \text{s}^{-1}$ . Squares show growth in medium supplemented with 0.5% of glucose, circles growth at 16h light/8h light/dark photoperiod in minimal medium, triangles growth under continuous light regime in minimal medium. WT, *ndufb10* and *ndufa5* KO are shown respectively in black, red and blue. Average  $\pm$  SD ( $n \geq 5$ ) is reported.

Supplemental Figure S3.

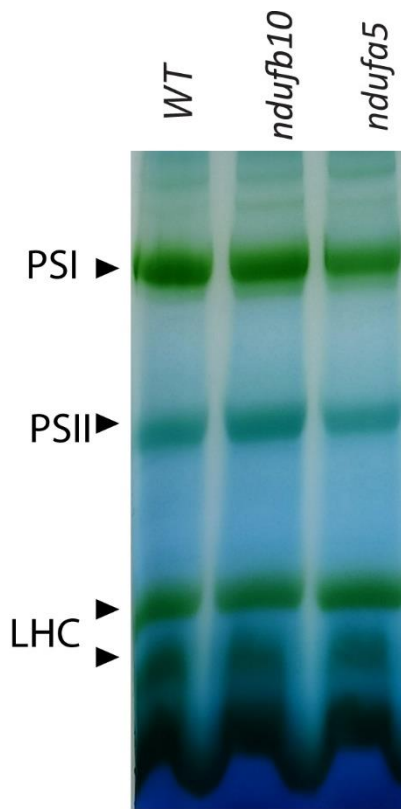

**Supplemental Figure S3. BN-PAGE separation of crude extracts.** Crude membrane protein extracts from WT, *ndufb10* and *ndufa5* were solubilized with 1% of  $\beta$ -dodecyl maltoside ( $\beta$ -DM). Complexes of thylakoid membranes identifiable as green bands are indicated; PSI, Photosystem I; PSII, photosystem II; LHC, light-harvesting chlorophyll complexes.

Supplemental Figure S4.

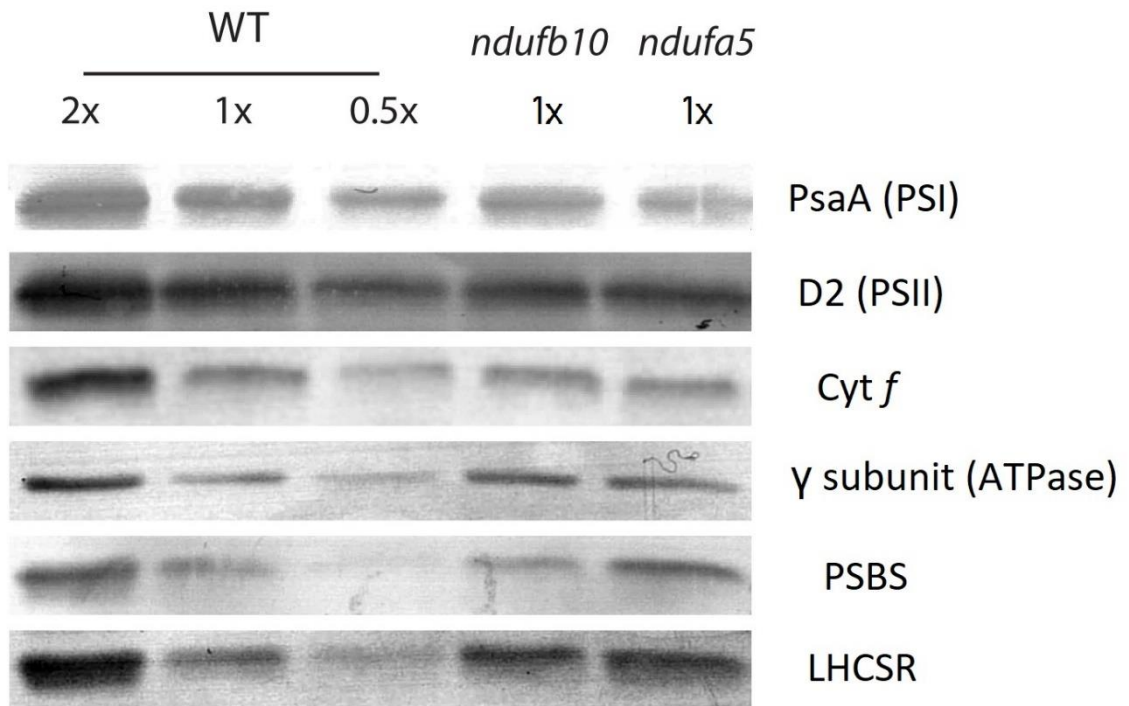

Supplemental Figure S4. Impact of Complex I mutations on the photosynthetic apparatus composition. Immunoblot analysis of various proteins of the photosynthetic apparatus. For WT 1X, *ndufb10* and *ndufa5* a total protein extract amount equivalent to 2  $\mu$ g of total chlorophyll was loaded. 2X and 0.5X correspond to an equivalent of 4  $\mu$ g and 1  $\mu$ g of total chlorophyll. PSI and PSII, Photosystem I and II; Cyt, Cytochrome.

Supplemental Figure S5.

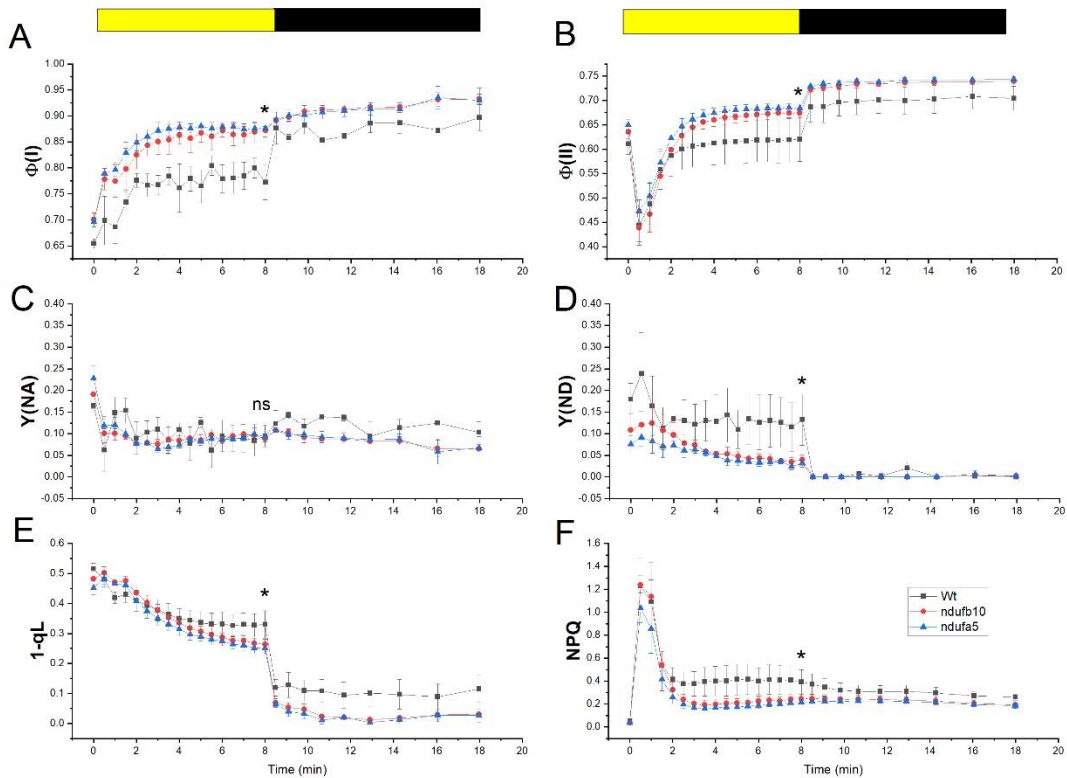

**Supplemental Figure S5. Photosynthetic efficiency under dim illumination.** The yield of PSI ( $\Phi(I)$ , A), PSII ( $\Phi(II)$ , B), PSI acceptor side limitation ( $Y(NA)$ , C), PSI donor side limitation ( $Y(ND)$ , D), PQ redox state ( $1-qL$ ; E) and non-photochemical quenching (NPQ; F) were monitored under illumination of  $50 \mu\text{mol photons m}^{-2}\text{s}^{-1}$  corresponding to light intensity during growth. WT, *ndufb10* and *ndufa5* KO are shown respectively as black squares, red circles and blue triangles. Yellow/black bar indicates light on/off. Data are shown as average  $\pm$  SD ( $n > 4$ ). Asterisks indicate statistically significant differences (one-way ANOVA,  $n > 5$ ,  $p < 0.01$ ) between WT and both mutants while ns indicates when eventual differences are not statically significant. Statistical analyses were performed for the last point before light was switched off.

Supplemental Figure S6.

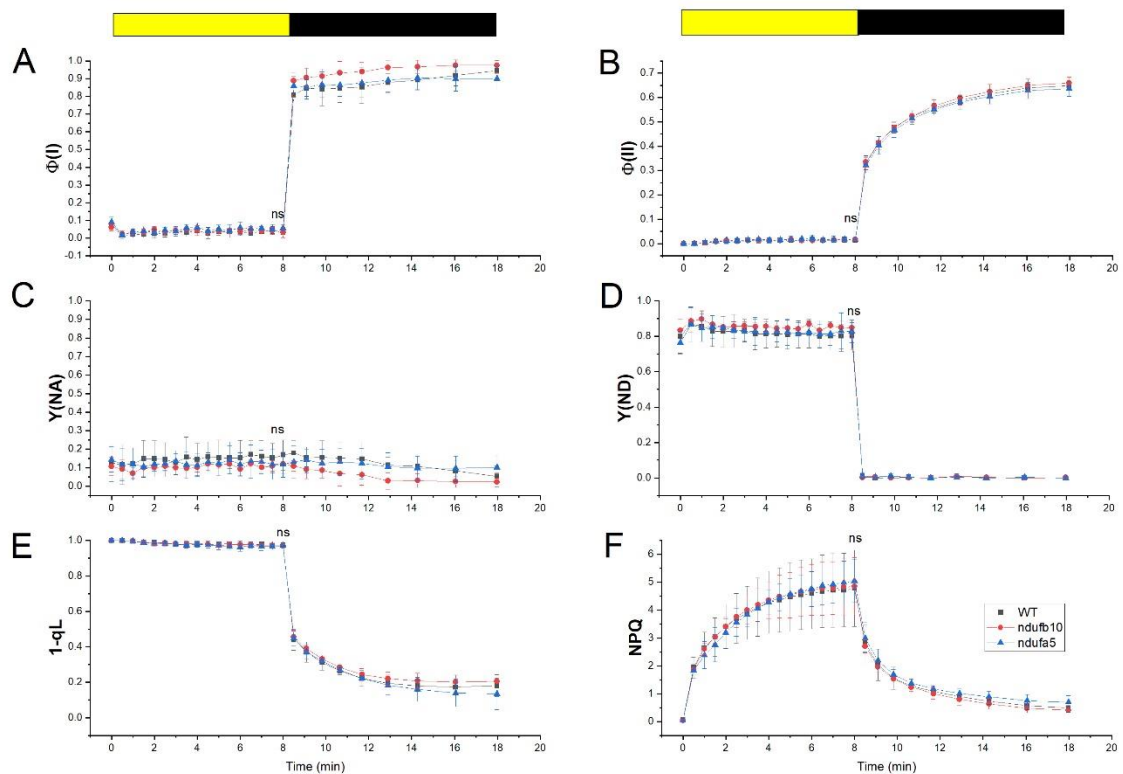

**Supplemental Figure S6. Photosynthetic efficiency under saturating illumination.** The yield of PSI ( $\Phi(I)$ , A), PSII ( $\Phi(II)$ , B), PSI acceptor side limitation ( $Y(NA)$ , C), PSI donor side limitation ( $Y(ND)$ , D), PQ redox state (1-qL; E) and non-photochemical quenching (NPQ; F) under  $2000 \mu\text{mol photons m}^{-2}\text{s}^{-1}$  of light intensity. WT, *ndufb10* and *ndufa5* KO are shown respectively with black square, red circle and cyan triangle. Yellow boxes above the panels represent actinic light on, instead black boxes represent actinic light off. Data are shown as average  $\pm$  SD ( $n > 4$ ). Statistical analysis was performed for the last point of illumination before light was switched off (one-way ANOVA,  $n > 4$ ,  $p < 0.01$ ; ns = not significant).

Supplemental Figure S7.

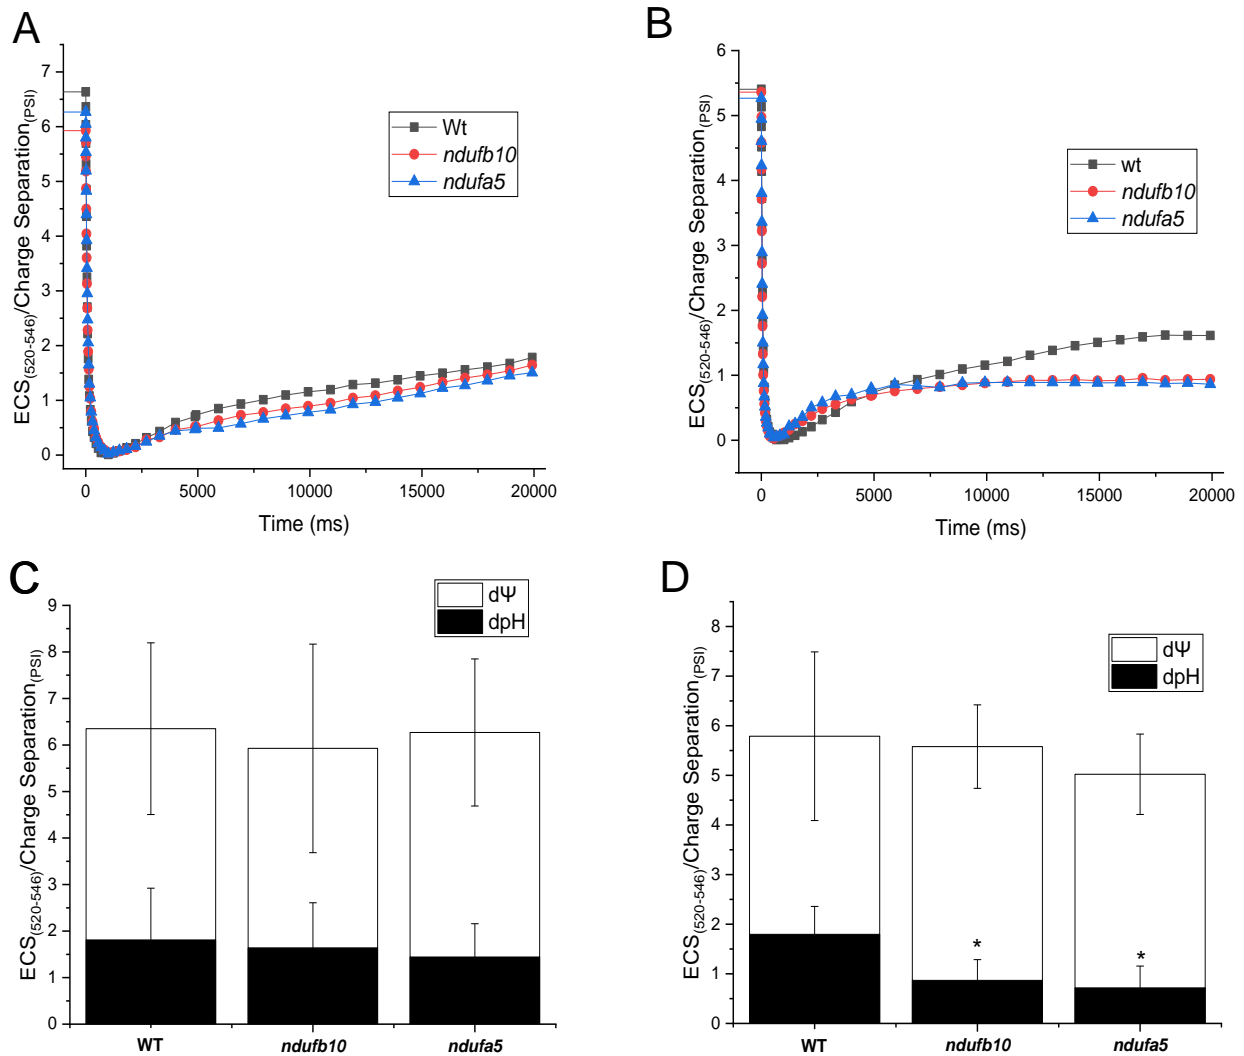

**Supplemental Figure S7: Proton motive force composition before the steady state.** A-B) Representative traces of the ECS (Electro-Chromic Shift) signal after the light is switch off after 60 s (A) and 120 s (B) of illumination ( $300 \mu\text{mol photons m}^{-2} \text{s}^{-1}$ ). WT, *ndufb10* and *ndufa5* KO are shown respectively as black squares, red circles and blue triangles. C-D) pmf partitioning after 60 s (C) and 120 s (D) is represented with black columns for  $\Delta\text{pH}$  component and white columns for the electrical potential ( $\Delta\Psi$ ) Data are shown as average  $\pm$  SD. For D asterisks indicate statistically significant differences (one-way ANOVA,  $n > 5$ ,  $p < 0.01$ ).

Supplemental Figure S8.

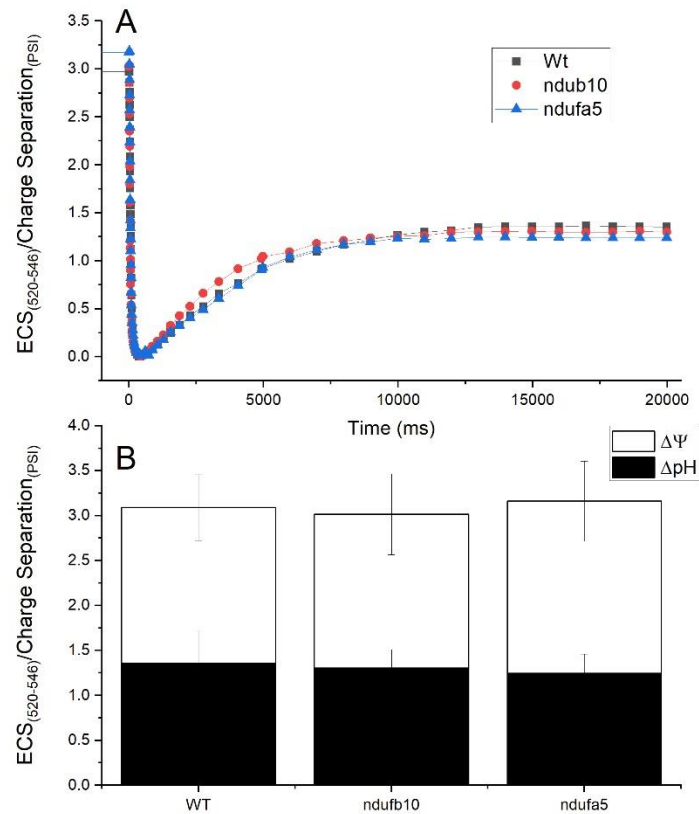

**Supplemental Figure S8: Photosynthetic proton motive force at saturating illumination.** Proton motive force (pmf) generated in thylakoids membranes assessed by ECS (Electro-Chromic Shift) signal in plants exposed for 300 seconds of illumination with saturating light ( $900 \mu\text{mol m}^{-2} \text{s}^{-1}$ ). A) Representative tracks of the ECS signal after light is switch off. WT, *ndub10* and *ndufa5* KO are shown respectively with black square, red circle and cyan triangle. B) Black columns are representative for the osmotic components ( $\Delta pH$ ) of pmf while white columns show the electrical potential ( $\Delta \Psi$ ). Data are shown as average  $\pm$  SD ( $n > 5$ ).



Supplemental Figure S9.

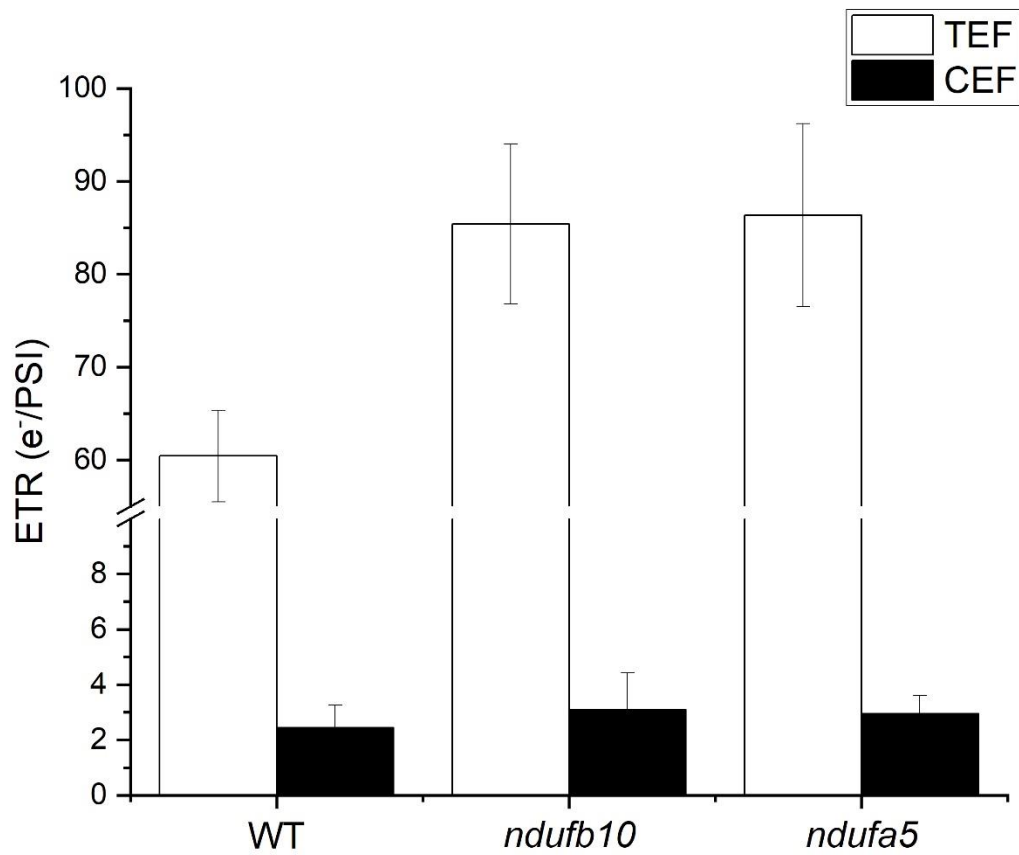

**Supplemental Figure S9: Photosynthetic electron transfer (ETR) in *P. patens* plants.** A) Total photosynthetic electron flow (TEF) and B) cyclic electron flow (CEF) measured in vivo in WT in *ndufb10* and *ndufa5* KO at 300  $\mu\text{mol photons m}^{-2}\text{s}^{-1}$  actinic light, calculated from electrochromic shift signal. Electron transport rate values are normalized to xenon-induced PSI turnovers. Data are shown as average  $\pm$  SD ( $n > 4$ ).

Supplemental Figure S10.

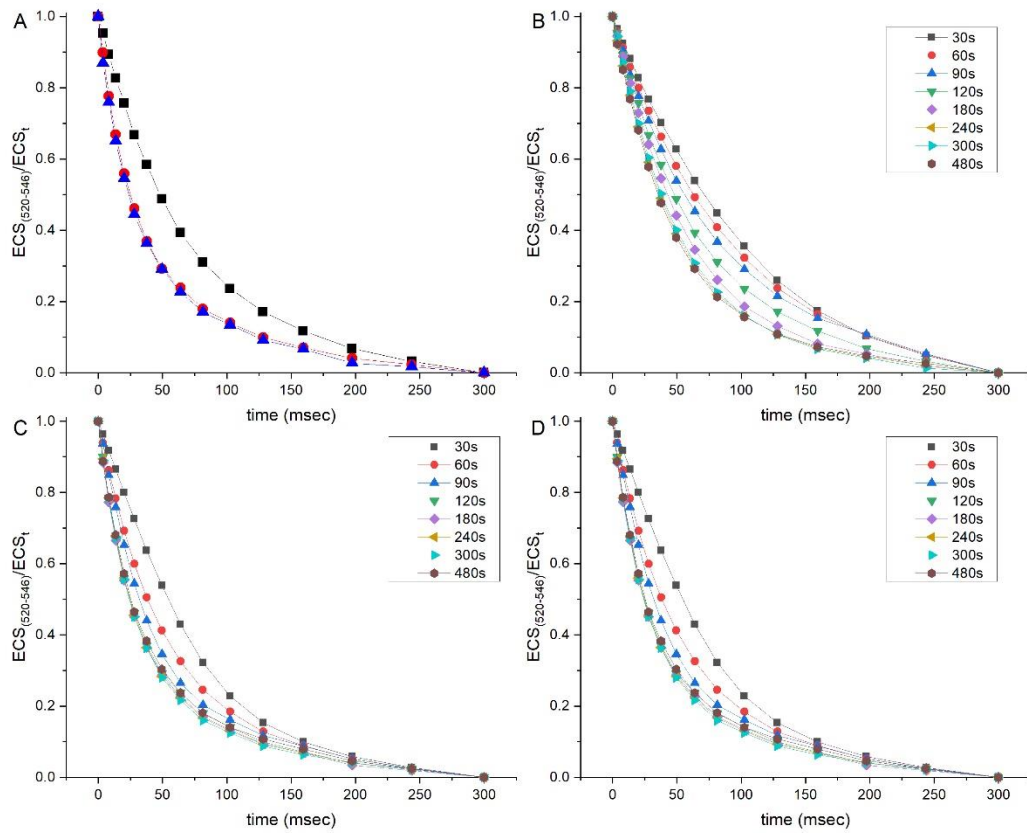

**Supplemental Figure S10. ATPase activity assessed from ECS relaxation.** A) Examples of ECS (Electro-Chromic Shift) relaxation kinetics after 120 seconds of illumination with sub-saturating light ( $300 \mu\text{mol m}^{-2} \text{s}^{-1}$ ). WT, *ndufb10* and *ndufa5* KO are shown respectively as black squares, red circles and blue triangles. B-D) Examples of ECS relaxation traces for WT (B), *ndufb10* (C) and *ndufa5* (D) measured after illumination of different length. In every panel traces after 30, 60, 90, 120, 180, 240, 300 and 480 seconds are shown respectively as black squares, red circles, blue triangles, green triangles, magenta squares, ochre triangles, cyan triangles and carmine hexagons.

Supplemental Figure S11.

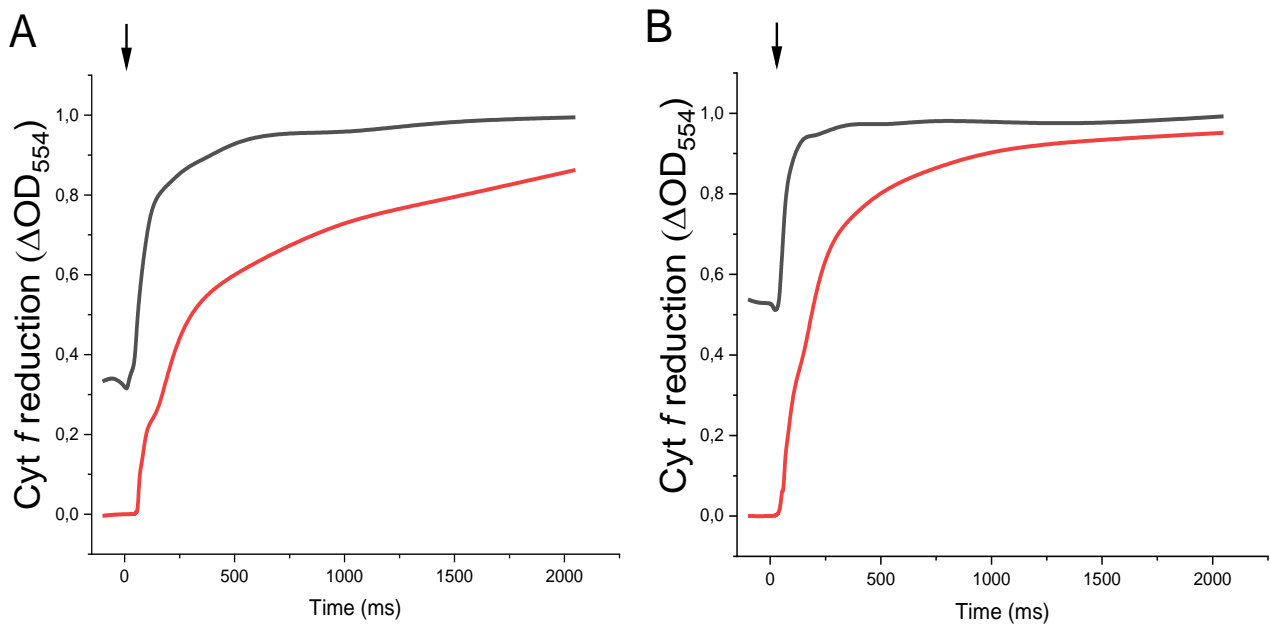

**Supplemental Figure S11: Cyt *b6f* reduction state estimation.** WT (A) and *ndufa5* (B) are here reported. Cyt *f* (cytochrome *f*) reduction showed in Figure 7 was measured by comparing the maximal signal obtained after 480 seconds under a saturating illumination (black line) with the signal obtained after treating the same sample by DCMU and DBMIB (red line). The traces here reported show the first 2000ms after light is switched off. The cyt *f* reduction rate was measured with a multiple exponential fitting of the complete cyt *f* reduction curve. All samples are normalized to the maximal signal. Arrows (t = 0): light off.

Supplemental Figure S12.

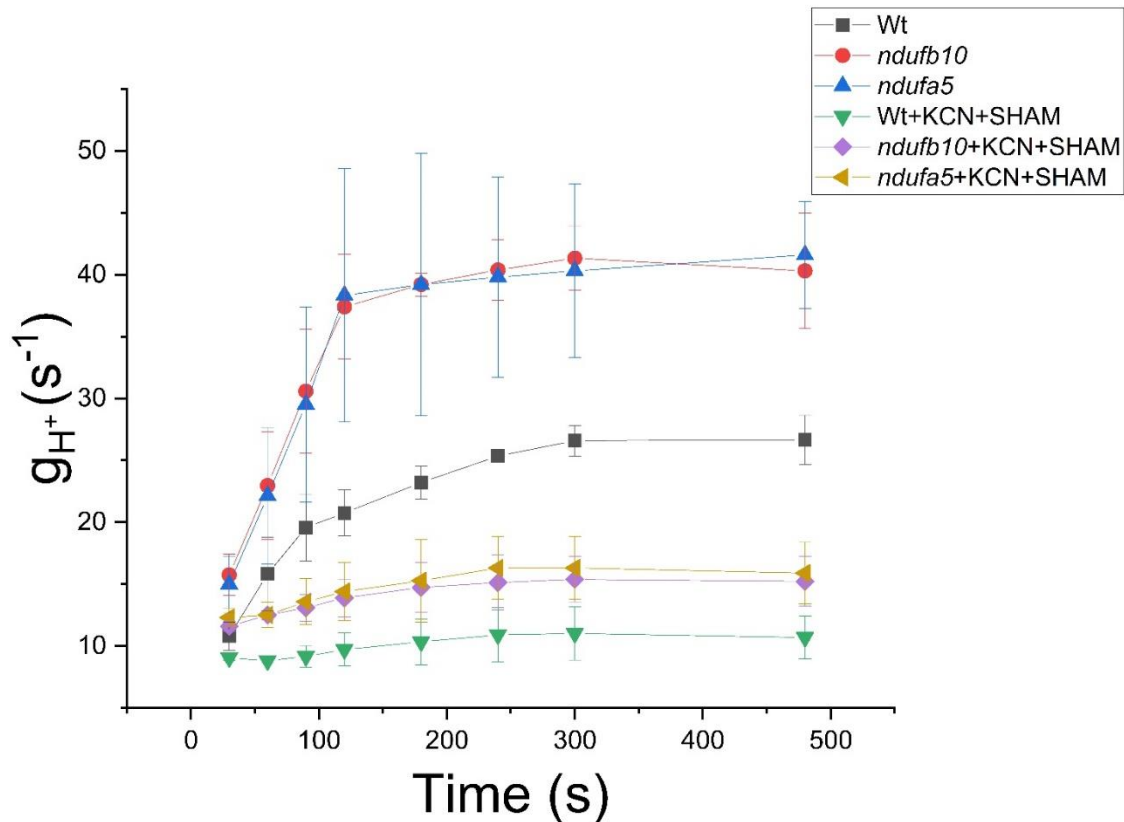

**Supplemental Figure S12. Influence of respiration inhibition (KCN+SHAM) on proton conductivity ( $g_{H^+}$ ) in WT and CI mutants.** Proton conductivity ( $g_{H^+}$ ) measured in control conditions and when respiration is fully inhibited in both WT and CI mutants with KCN 1mM and SHAM 8mM (as in Figure 4C). For control conditions WT, *ndufb10* and *ndufa5* KO are shown respectively with black squares, red circles and blue triangles. For the treatment with inhibitors WT, *ndufb10* and *ndufa5* KO are shown respectively with green triangles, magenta squares, ochre triangles.  $g_{H^+}$  was calculated after exposure to 30s, 60s, 90s, 120s, 180s, 240s, 300s and 480s of illumination (approx.  $350 \mu\text{mol photons m}^{-2}\text{s}^{-1}$ ) by fitting the first 300 ms of the ECS (Electro-Chromic Shift) decay curve with a first-order exponential decay kinetic and indicated as the inverse of the decay time constant (Avenson et al., 2005). Data are shown as average  $\pm$  SD ( $n > 3$ ).

Supplemental Figure S13.

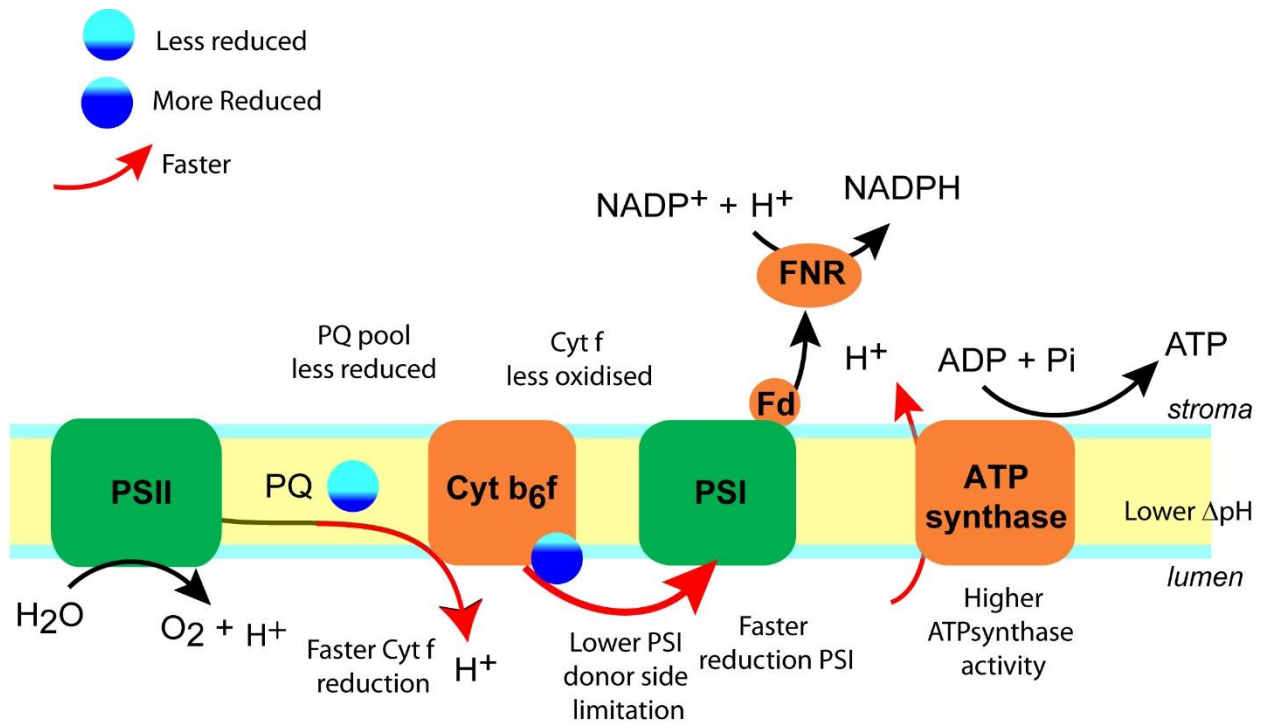

Supplemental Figure S13. Summary of photosynthetic electron transport alterations in Cl depleted plants. Scheme of the main components of photosynthetic electron transport from water to  $NADP^+$  summarizing all differences observed in the mutants with respect to WT. PSII, Photosystem II; PQ, plastoquinone; Cyt, cytochrome; Fd, Ferredoxin; FNR, Ferredoxin NADP reductase.

**Supplemental Table S1. Identification of conserved CI subunits in *P. patens*.** Complex I subunits from *B. taurus*, *Y. lipolytica*, *C. reinhardtii* and *A. thaliana* were obtained from Salinas et al., 2014, Subrahmanian et al., 2016 and Klusch et al., 2020. Names of proteins are based on published papers and reviews (see references). *P. patens* nuclear homologous sequences were identified using BLAST facilities (<https://blast.ncbi.nlm.nih.gov/Blast.cgi>) with fungal, mammal, and plant protein and genic sequences against the *P. patens* genome (v3.3) (Lang et al., 2018; <https://phytozome.jgi.doe.gov/pz/portal.html>). Subunits encoded in the mitochondrial genome were identified from Terasawa et al., 2007. Name for the subunits in plants are reported only when they differ from animals or yeast. In red are indicated subunits that were confirmed by proteomic analyses (Mueller et al., 2014) In bold are indicated the subunits choose for inactivation of the complexes. a) Salinas et al., 2014; b) Subrahmanian et al., 2016; c) Terasawa et al., 2007; d) Klusch et al., 2020 e) Rak and Rustin, 2014; f) Barbieri et al., 2011; g) Klodmann et al., 2011, h) Mueller et al., 2014.

| <i>B. taurus</i>               | <i>Y. lipolytica</i> | <i>A. thaliana</i>                    | <i>C. reinhardtii</i>  | <i>P. patens</i>                                                       | Ref.          |
|--------------------------------|----------------------|---------------------------------------|------------------------|------------------------------------------------------------------------|---------------|
| <b>Bacterial core</b>          |                      |                                       |                        |                                                                        |               |
| ND1                            | ND1/ NU1M            | AtMg00516,<br>AtMg01120,<br>AtMg01275 | AAB93446, nd1          | YP_539026                                                              | a, b, c,<br>d |
| ND2                            | ND2/ NU2M            | AtMg00285,<br>AtMg01320               | AAB93444, nd2          | YP_539019                                                              | a, b, c,<br>d |
| ND3                            | ND3/ NU3M            | AtMg00990                             | AAQ55461, ND3          | YP_539030                                                              | a, b, c,<br>d |
| ND4                            | ND4/ NU4M            | AtMg00580                             | AAB93441, nd4          | YP_539018                                                              | a, b, c,<br>d |
| ND4L                           | ND4L/<br>NULM        | AtMg00650                             | AAO61142, nd4L         | YP_539012                                                              | a, b, c,<br>d |
| ND5                            | ND5/ NU5M            | AtMg00060,<br>AtMg00513,<br>AtMg00665 | AAB93442, nd5          | YP_539016                                                              | a, b, c,<br>d |
| ND6                            | ND6/ NU6M            | AtMg00270                             | AAB93445, nd6          | YP_539023                                                              | a, b, c,<br>d |
| NDUFS1/ 75 kD                  | NUO78/<br>NUAM       | At5g37510                             | XP_001692885,<br>NUOS1 | <b>Pp3c1_34110,<br/>Pp3c1_34100,<br/>Pp3c1_34140,<br/>Pp3c19_19270</b> | a, b, d,<br>h |
| NDUFS2                         | NUO49/<br>NUCM       | AtMg00510                             | XP_001697607,<br>ND7   | <b>YP_539031</b>                                                       | a, b, d,<br>h |
| NDUFS3                         | NUO30.4              | AtMg00070                             | XP_001690652,<br>ND9   | <b>YP_539028</b>                                                       | a, b, d,<br>h |
| NDUFS7/ PSST                   | NUO19.3/<br>NUKM     | At5g11770                             | XP_001700585,<br>NUO10 | Pp3c15_14890,<br>Pp3c15_20620                                          | a, b, d       |
| NDUFS8/ TYKY                   | NUO21.3c/<br>NUIM    | At1g16700,<br>At1g79010               | XP_001702368,<br>NUO8  | Pp3c9_8460,<br>Pp3c15_4330                                             | a, b, d       |
| NDUFV1                         | 51/ NUBM             | At5g08530                             | XP_001702590,<br>NUO6  | Pp3c4_17990,<br>Pp3c12_4050                                            | a, b, d       |
| NDUFV2                         | NUO24/<br>NUHM       | At4g02580                             | XP_001698508,<br>NUO5  | Pp3c2_9810,<br>Pp3c2_9813                                              | a, b, d       |
| <b>Conserved supernumerary</b> |                      |                                       |                        |                                                                        |               |
| NDUFA1/<br>MWFE                | NUO9.8/<br>NIMM      | At3g08610                             | XP_001698399,<br>NUOA1 | Pp3c10_5690,<br>Pp3c10_5720                                            | a, b, d       |

|                          |                          |                                 |                                 |                                               |               |
|--------------------------|--------------------------|---------------------------------|---------------------------------|-----------------------------------------------|---------------|
| NDUFA2/ B8               | NUO10.5/<br>NI8M         | At5g47890                       | XP_001695875,<br>NUOB8          | Pp3c20_8510                                   | a, b, d       |
| NDUFB3/ B12              | NUO10.6/<br>NB2M         | At2g02510,<br>At1g14450         | XP_001700920,<br>NUOB12         | Pp3c9_5250,<br>Pp3c15_3960                    | a, b, d       |
| <b>NDUFA5/ B13</b>       | <b>NUO29.9/<br/>NUFM</b> | <b>At5g52840</b>                | <b>XP_001693453,<br/>NUOB13</b> | <b>Pp3c5_12290</b>                            | a, b, d,<br>e |
| NDUFS6/ 13 kD            | NUO18.4/<br>NUMM         | At3g03070                       | XP_001703419,<br>NUOS6          | Pp3c24_2620                                   | a, b, d       |
| NDUFA6/ B14              | NUO14.8/<br>NB4M         | At3g12260                       | XP_001694042,<br>NUOB14         | Pp3c1_37620,<br>Pp3c2_3180                    | a, b, d       |
| NDUFA11/<br>B14.7        | NUO21.3b/<br>NUJM        | At2g42210                       | XP_001689829,<br>TIM17          | Pp3c5_22310,<br>Pp3c6_9862                    | a, b, d       |
| NDUFB11<br>/ESSS         | NUO11.7/<br>NUWM         | At3g57785,<br>At2g42310         | XP_001697702,<br>NUO17          | Pp3c3_16790                                   | a, b, d       |
| NDUFS5/ PFFD             | NUO11.5/<br>NIPM         | At3g62790,<br>At2g47690         | XP_001691060,<br>NUOS5          | Pp3c7_20680,<br>Pp3c11_13470                  | a, b, d       |
| NDUFB4/B15               | NUO6.6/<br>NUVM          | At2g31490                       | XP_001693191,<br>NUOB4          | Pp3c16_220,<br>Pp3c25_300                     | a, b, d       |
| DAP13/ B17.2             | NUO13.4                  | At3g03100                       | XP_001699522                    | Pp3c16_5910                                   | a, b, d       |
| NDUFB7/ B18              | NB8M                     | At2g02050                       | XP_001698082,<br>NUOB18         | Pp3c10_11190,<br>Pp3c14_25130                 | a, b          |
| NDUFA12/<br>B16.6        | NUO14/<br>NB6M           | At1g04630,<br>At2g33220         | XP_001701450,<br>NUOB16         | Pp3c5_4240,<br>Pp3c16_2570                    | a, b, d       |
| DAP13/ B17.2             | NUO13.4/<br>N7BM         | At3g03100                       | XP_001699522,<br>NUO13          | Pp3c16_5910                                   | a, b          |
| NDUFB7/ B18              | NB8M                     | At2g02050                       | XP_001698082,<br>NUOB18         | Pp3c10_11190,<br>Pp3c14_25130                 | a, b, d       |
| NDUFS4/<br>AQDQ          | NUO21/<br>NUYM           | At5g67590                       | XP_001695601,<br>NUOS4          | Pp3c8_17050,<br>Pp3c12_14210,<br>Pp3c24_19370 | a, b, d       |
| NDUFA8/ PGIV             | NUO20.8/<br>NUPM         | At5g18800,<br>At3g06310         | XP_001700114,<br>NUOA8          | Pp3c3_33480,<br>Pp3c4_6220,<br>Pp3c10_17050   | a, b, d       |
| NDUFB9/ B22              | NI2M                     | At4g34700                       | XP_001698797,<br>NUOB22         | Pp3c6_19130                                   | a, b, d       |
| <b>NDUFB10/<br/>PDSW</b> | <b>NUO12.3/<br/>NIDM</b> | <b>At1g49140,<br/>At3g18410</b> | <b>XP_001694041,<br/>NUOB10</b> | <b>Pp3c9_26150</b>                            | a, b, d, f    |
| NDUFA9/<br>39 kD         | NUO40/<br>NUEM           | At2g20360                       | XP_001702653,<br>NUOA9          | Pp3c1_35920,<br>Pp3c14_9070                   | a, b, d       |
| NDUFB8/ ASHI             | NUO20.1/<br>NIAM         | At5g47570                       | XP_001700273,<br>TEF29          | Pp3c20_8820                                   | a, b, d       |
| NDUFB2/AGGG              | NCU01436                 | At1g76200                       | –                               | Pp3c18_1920,<br>Pp3c21_21340                  | a, b, d       |
| NDUFB1/<br>MNLL          | NUO20.9/<br>NUXM         | At4g16450                       | XP_001696533,<br>NUO21          | <b>Pp3c6_28950</b>                            | a, b, d,<br>h |
| NDUFC2/<br>B14.5B        | NUO10.4                  | At4g20150 (NDU9)                | XP_001693474,<br>NUOP1          | Pp3c1_24730,<br>Pp3c14_13800                  | a, b, d       |
| NDUFC1/ KFYI             | NCU08300                 | At4g00585                       | XP_001697243                    | Pp3c7_13700                                   | a, b, d       |
| NDUFA3/ B9               | NUO9.5/<br>NI9M          | At2g46540                       | XP_001692978                    | Pp3c23_12490                                  | a, b, d       |

|                              |          |                                                                                                   |                                                                                      |                                                                                                  |                  |
|------------------------------|----------|---------------------------------------------------------------------------------------------------|--------------------------------------------------------------------------------------|--------------------------------------------------------------------------------------------------|------------------|
| NDUFAB1/<br>ACPM             | SDAP     | At1g65290,<br>At2g44620                                                                           | XP_001699275,<br>ACP1                                                                | Pp3c13_14790,<br>Pp3c20_7570,<br>Pp3c23_19250,<br>Pp3c24_6630                                    | a, b, d          |
| NDUFA7                       | NCU08930 | At5g08060                                                                                         | XP_001703194                                                                         | Pp3c16_5680                                                                                      | a, b, d          |
| NDUFA4/<br>MLRQ              | NCU02016 | At3g29970                                                                                         | –                                                                                    | Pp3c3_14700,<br>Pp3c4_20270,<br>Pp3c26_5980                                                      | a, b             |
| NDUFA10                      | –        | At1g72040                                                                                         | –                                                                                    | Pp3c12_15090                                                                                     | a, b             |
| <b><i>Plant specific</i></b> |          |                                                                                                   |                                                                                      |                                                                                                  |                  |
| –                            | –        | At5g63510 (CAL1),<br>At1g19580 (CA1),<br>At3g48680 (CAL2),<br>At1g47260 (CA2),<br>At5g66510 (CA3) | XP_001703237,<br>XP_001701594,<br>XP_001696746<br>( $\gamma$ -carbonic<br>anhydrase) | Pp3c4_16870,<br>Pp3c7_19540,<br><b>Pp3c7_4200,</b><br><b>Pp3c11_22520,</b><br><b>Pp3c1_7500,</b> | a, b, d,<br>g, h |
| –                            | –        | At2g28430                                                                                         | –                                                                                    | Pp3c7_7440                                                                                       | a, b, g          |
| –                            | –        | At5g14105 (P3),<br>At1g67350 (P1),<br>At1g68680,<br>At2g27730 (P2)<br>(membrane arm<br>subunits)  | –                                                                                    | <b>Pp3c1_22500,</b><br>Pp3c1_33450,<br>Pp3c3_5450,<br>Pp3c11_6600,<br><b>Pp3c14_2790,</b>        | a, b, g,<br>h    |
| –                            | –        | At3g07480<br>(Ferredoxin)                                                                         | XP_001699817,<br>NUOP3,                                                              | Pp3c2_31000,<br>Pp3c9_680                                                                        | a, b, d          |



**Supplemental Table S2. Capacities of the cytochrome and the AOX pathways in WT and *ndufb10* and *ndufa5* plants.** The cyt pathway capacity is defined as O<sub>2</sub> uptake in the presence of SHAM that was sensitive to KCN. The AOX pathway capacity is defined as the O<sub>2</sub> uptake in the presence of KCN that was sensitive to SHAM. Calculations were made from data in figure 4 and respiration activity in plants treated with SHAM only, also reported here. Data are shown as average ± SD (n > 4).

| <b>nmolO<sub>2</sub>/(mg<sub>chl</sub>*min)</b> | <b>WT</b>  | <b><i>ndufb10</i></b> | <b><i>ndufa5</i></b> |
|-------------------------------------------------|------------|-----------------------|----------------------|
| Cyt capacity                                    | 52.9 ± 8.1 | 52.2 ± 8.4            | 54.4 ± 7.4           |
| AOX capacity                                    | 36.0 ± 9.7 | 73.4 ± 6.6            | 72.4 ± 7.4           |
|                                                 |            |                       |                      |
| + 8 mM SHAM                                     | 74.3 ± 7.6 | 73.1 ± 8.0            | 75.2 ± 7.0           |

Supplemental Table S3: Primers employed in this work

| Gene                           | Primer Name | Sequence                       | Use                  |
|--------------------------------|-------------|--------------------------------|----------------------|
| Ndufb10                        | Ndufb10-p1  | GTTTAAACGGCCCTAATGACATAAGTCCC  | KO isolation         |
|                                | Ndufb10-p2  | CTCGAGGTGGATGAATGATGCTGGTG     | KO isolation         |
|                                | Ndufb10-p3  | ATCGATCAAGTCGAGAAGGCGAAGATC    | KO isolation         |
|                                | Ndufb10-p4  | TTAATTAAGATGGCGTCGAGTTCCTTCATC | KO isolation         |
|                                | Ndufb10-p5  | GGATCCACAATCAGGAATTA           | KO screening         |
|                                | Ndufb10-p6  | ACCAAAGCAGTCCTGAAC             | KO screening         |
|                                | Ndufb10-RTf | GTTCAACAGCGACTACCCTA           | RT-PCR               |
|                                | Ndufb10-RTr | GAAACCCTGTTCTGAAATG            | RT-PCR               |
| Ndufa5                         | Ndufa5-p1   | CCTAGGCAATTCAGTATCCCTTACGC     | KO isolation         |
|                                | Ndufa5-p2   | CTCGAGGGTCTGGTTTCCAACAATAA     | KO isolation         |
|                                | Ndufa5-p3   | GTTAACGATGTTGACATGCACAGAAG     | KO isolation         |
|                                | Ndufa5-p4   | TTAATTAAGACAACACTAGGAACCATCCAA | KO isolation         |
|                                | Ndufa5-p5   | ATCAAACCCTGTACACCAAC           | KO screening         |
|                                | Ndufa5-p6   | TGCAACTCATCTGTCCAATA           | KO screening         |
|                                | Ndufa5-RTf  | TGCTTCATCATGTTTTTGAG           | RT-PCR               |
|                                | Ndufa5-RTr  | AGAGCCAGATCAACAAGAAA           | RT-PCR               |
| Hygromycin resistance cassette | HNZ Up rev  | TGCGCAACTGTTGGGAAG             | KO screening         |
|                                | HN Down for | CCGCTGAAATCACCAGTCTC           | KO screening         |
| Actin                          | Actin2f     | GCGAAGAGCGAGTATGACGAG          | KO screening, RT-PCR |
|                                | Actin2r     | AGCCACGAATCTAACTTGTGATG        | KO screening, RT-PCR |

## Bibliography

- Avenson, T.J., Cruz, J.A., Kanazawa, A., Kramer, D.M., 2005. Regulating the proton budget of higher plant photosynthesis. *Proc. Natl. Acad. Sci. U. S. A.* 102, 9709–13. <https://doi.org/10.1073/pnas.0503952102>
- Barbieri, M.R., Larosa, V., Nouet, C., Subrahmanian, N., Remacle, C., Hamel, P.P., 2011. A forward genetic screen identifies mutants deficient for mitochondrial complex I assembly in *Chlamydomonas reinhardtii*. *Genetics* 188, 349–58. <https://doi.org/10.1534/genetics.111.128827>
- Klodmann, J., Senkler, M., Rode, C., Braun, H.-P., 2011. Defining the protein complex proteome of plant mitochondria. *Plant Physiol.* 157, 587–598.
- Klusch, N., Senkler, J., Yildiz, Ö., Kühlbrandt, W., Braun, H.-P., 2020. A ferredoxin bridge connects the two arms of plant mitochondrial complex I. *bioRxiv* 2020.11.23.393975. <https://doi.org/10.1101/2020.11.23.393975>
- Lang, D., Ullrich, K.K., Murat, F., Fuchs, J., Jenkins, J., Haas, F.B., Piednoel, M., Gundlach, H., Van Bel, M., Meyberg, R., Vives, C., Morata, J., Symeonidi, A., Hiss, M., Muchero, W., Kamisugi, Y., Saleh, O., Blanc, G., Decker, E.L., van Gessel, N., Grimwood, J., Hayes, R.D., Graham, S.W., Gunter, L.E., McDaniel, S.F., Hoernstein, S.N.W., Larsson, A., Li, F.-W., Perroud, P.-F., Phillips, J., Ranjan, P., Rokshar, D.S., Rothfels, C.J., Schneider, L., Shu, S., Stevenson, D.W., Thümmler, F., Tillich, M., Villarreal Aguilar, J.C., Widiez, T., Wong, G.K.-S., Wymore, A., Zhang, Y., Zimmer, A.D., Quatrano, R.S., Mayer, K.F.X., Goodstein, D., Casacuberta, J.M., Vandepoele, K., Reski, R., Cuming, A.C., Tuskan, G.A., Maumus, F., Salse, J., Schmutz, J., Rensing, S.A., 2018. The *Physcomitrella patens* chromosome-scale assembly reveals moss genome structure and evolution. *Plant J.* 93, 515–533. <https://doi.org/10.1111/tpj.13801>
- Mueller, S.J., Lang, D., Hoernstein, S.N.W., Lang, E.G.E., Schuessele, C., Schmidt, A., Fluck, M., Leisibach, D., Niegl, C., Zimmer, A.D., Schlosser, A., Reski, R., 2014. Quantitative Analysis of the Mitochondrial and Plastid Proteomes of the Moss *Physcomitrella patens* Reveals Protein Macrocompartmentation and Microcompartmentation. *Plant Physiol.* 164, 2081–2095. <https://doi.org/10.1104/pp.114.235754>
- Rak, M., Rustin, P., 2014. Supernumerary subunits NDUFA3, NDUFA5 and NDUFA12 are required for the formation of the extramembrane arm of human mitochondrial complex I. *FEBS Lett.* 588, 1832–1838. <https://doi.org/10.1016/j.febslet.2014.03.046>
- Salinas, T., Larosa, V., Cardol, P., Maréchal-Drouard, L., Remacle, C., 2014. Respiratory-deficient mutants of the unicellular green alga *Chlamydomonas*: a review. *Biochimie* 100, 207–18. <https://doi.org/10.1016/j.biochi.2013.10.006>
- Subrahmanian, N., Remacle, C., Hamel, P.P., 2016. Plant mitochondrial Complex I composition and assembly: A review. *Biochim. Biophys. Acta - Bioenerg.* 1857, 1001–1014. <https://doi.org/10.1016/j.bbabi.2016.01.009>
- Terasawa, K., Odahara, M., Kabeya, Y., Kikugawa, T., Sekine, Y., Fujiwara, M., Sato, N., 2007. The mitochondrial genome of the moss *Physcomitrella patens* sheds new light on mitochondrial evolution in land plants. *Mol. Biol. Evol.* 24, 699–709. <https://doi.org/10.1093/molbev/msl198>
